# Supplementary material
Source: MDPI journal article supplement (https://www.mdpi.com/2311-553X/9/1/7)
Supplement: s1 [file s1]

## Supplementary information

**Table S1:** Primer list

| Primer name                  | Sequence                    |
|------------------------------|-----------------------------|
| mmKalnc1_RP                  | CACAAAGGCCACTTTCTCCT        |
| mmKalnc1_FP                  | CTCCCCCAGTCATGAACC          |
| mmKalnc2_FP                  | TCGGGAGAAATCAAAGATGG        |
| mmKalnc2_RP                  | GGATCCATTCTCCATCCTCA        |
| mmKalnc3_FP                  | TGGGTCAGATGAACAGAGCA        |
| mmKalnc3_RP                  | GAGGAGGGGCTTGATGAGAT        |
| mmKalnc4.1_FP                | GTCAACGCCAGCTCTTTGTC        |
| mmKalnc4.1_FP                | CCTGGCTTCTGATGCTGTACTA      |
| mmKalnc4.2_RP                | TGTTACAGTGGGAGTCTGATGG      |
| mmKalnc4.2_FP                | ATGCTTGAATGGAACTGTCT        |
| mmKalnc5_FP                  | AAGCTGGACATCTTCCTACAGC      |
| mmKalnc5_RP                  | GAACGACTCAGGTTCCATTGTC      |
| mmKalnc6_FP                  | GTGGAGAACTCGGGTAAAAATG      |
| mmKalnc6_RP                  | AGTGATTTTCATTGTCCAAGG       |
| mmKalnc7_FP                  | TGTGTTGCAATACCAAGCTTTA      |
| mmKalnc7_RP                  | GAGCTTCACTCGAGGCACTG        |
| mouse Kalirin-7(Kal7)_FP     | GATACCATATCCATTGCCTCCAGGACC |
| mouse Kalirin-7(Kal7)_RP     | CCAGGCTGCGCGCTAAACGTAAG     |
| mouse Kalirin-9(Kal9)_FP     | GCCCCTCGCCAAAGCCACAGC       |
| mouse Kalirin-9(Kal9)_RP     | CCAGTGAGTCCCGTGGTGGGC       |
| mouse Kalirin-12(Kal12)_FP   | CAGCAGCCACGTGCCTGCAGC       |
| mouse Kalirin-12(Kal2)_RP    | TCTTGACATTGGGAATGGGCCGCAC   |
| mouse full-length Kalirin_FP | GCCTTTCTCAGCAAACACACTGGGG   |
| mouse full-length Kalirin_RP | ATTCCCCAGTCTGAGCCAGCTGC     |
| mmGapdh_FP                   | CTACACTGAGGACCAGGTTGTCT     |

|                   |                            |
|-------------------|----------------------------|
| mmGapdh_FP        | TCATACCAGGAAATGAGCTTGAC    |
| mmMalat1_FP       | GGCGGAATTGCTGGTAGTTT       |
| mmMalat1_RP       | AGCATAGCAGTACACGCCTT       |
| mm_circ_000686_FP | AGTGGGATTTATACCTGCATAGC    |
| mm_circ_000686_RP | GGAGGAGATGGTGTATGTTGC      |
| huKALNC2_FP       | GTGTGGTCCTGGTGAGGATG       |
| huKALNC2RP        | CCCATGATGGAGATGACACC       |
| human Kalirin_FP  | CATGGTGAGGCCTTTCTCAGCAAAC  |
| human Kalirin RP  | CAGGTGTCGAGCTGCCTTGTAGAT   |
| huGAPDH_FP        | GGGAGCCAAAAGGGTCATCA       |
| huGAPDH_RP        | TAAGCAGTTGGTGGTGCAGG       |
| humalat1_FP       | CGCTTGAGATTTGGGCTTTA       |
| humalat1_RP       | CTTCCTGTGGCAGGAGAGAC       |
| hu18SrRNA_FP      | GTAACCCGTTGAACCCCAT        |
| hu18SrRNA_RP      | CCATCCAATCGGTAGTAGCG       |
| hu45SrRNA_FP      | TCGCTGCGATCTATTGAAAG       |
| hu45SrRNA_RP      | AGGAAGACGAACGGAAGGAC       |
| huTUBB3_FP        | GCTCAGGGGCCTTTGGACATCTCTT  |
| huTUBB3_RP        | TTTTCACACTCCTTCCGCACCACATC |
| huGFAP_FP         | CCTCTCCCTGGCTCGAATGC       |
| huGFAP_RP         | GGAAGCGAACCTTCTCGATGTA     |
| huSOX2_FP         | CATGTCCCAGCACTACCAGA       |
| huSOX2_RP         | TACCGGGTTTTCTCCATGCT       |
| huNESTIN_FP       | TCTTTGCTCCCAGTCCTGAG       |
| huNESTIN_RP       | GGGCTCTGATCTCTGCATCT       |
| huMAP2_FP         | CTGCTTTACAGGGTAGCACAA      |
| huMAP2_RP         | TTGAGTATGGCAAACGGTCTG      |

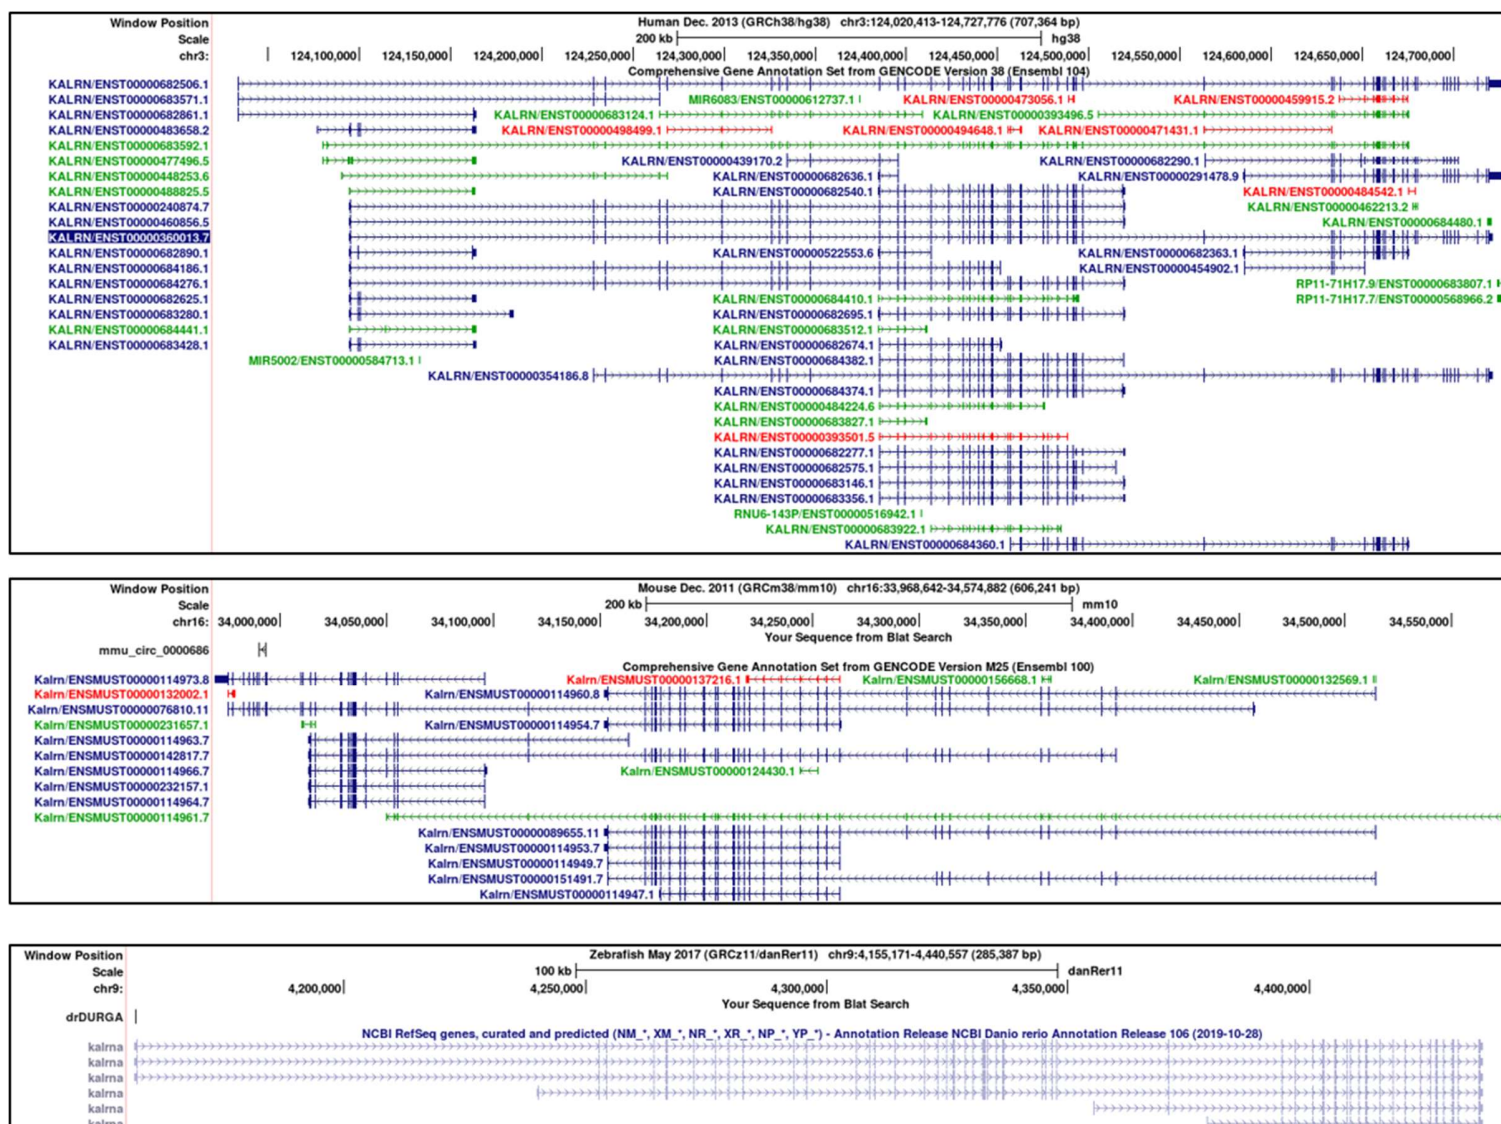

**Figure S1. View of the *Kalrn* gene locus of human, mouse and zebrafish, taken from UCSC genome browser.**

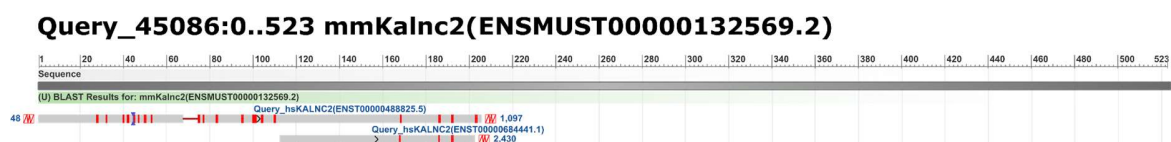

hsKALNC2(ENST00000488825.5)

Sequence ID: Query\_45089 Length: 1344 Number of Matches: 1

Range 1: 49 to 247 [Graphics](#) [Next Match](#) [Previous Match](#)

| Score         | Expect                                                        | Identities   | Gaps      | Strand    |
|---------------|---------------------------------------------------------------|--------------|-----------|-----------|
| 210 bits(132) | 7e-58                                                         | 178/206(86%) | 8/206(3%) | Plus/Plus |
| Query 1       | AGGCAGGCATTTGCTTAGAGCAGGCTGCGTGTGAGCCCAACATC -CGAGAATCTGGCCTC | 59           |           |           |
| Sbjct 49      | AGGCAGGCATTTGCTTAGAGCAGGCTGTGTGCGAGCCAGCGTCAAGTGATTCCGGCCTC   | 108          |           |           |
| Query 60      | CTCGAGTCGGTTGGTGGTGGCGGGATGAGGCTGTGCCCTGGAGACTGACTGTGAAGG     | 119          |           |           |
| Sbjct 109     | CTCGAGTC-----AGCGGTGGTGGGATGAGGCTCTGCCGAGGGGACTGGCTGTGAAGG    | 161          |           |           |
| Query 120     | ATGAGTTCAGGGTGGGATGACGGACCGCTTCTGGGACCACTGGTATCTTTGGTATCTCCG  | 179          |           |           |
| Sbjct 162     | ATGAGTTCAGGGTGGGATGACGGACCGCTTCTGGGACCACTGGTATCTCTGGTATCTCCG  | 221          |           |           |
| Query 180     | CTTGCTTCGGCTTCTGGATCGAGCTT                                    | 205          |           |           |
| Sbjct 222     | CTTGCTCCGGCTGCTGGATCGAGGTT                                    | 247          |           |           |

hsKALNC2(ENST00000684441.1)

Sequence ID: Query\_45088 Length: 2520 Number of Matches: 1

Range 1: 1 to 90 [Graphics](#) [Next Match](#) [Previous Match](#)

| Score        | Expect                                                        | Identities | Gaps     | Strand    |
|--------------|---------------------------------------------------------------|------------|----------|-----------|
| 134 bits(84) | 5e-35                                                         | 87/90(97%) | 0/90(0%) | Plus/Plus |
| Query 113    | GTGAAGGATGAGTTACAGGGTGGGATGACGGACCGCTTCTGGGACCACTGGTATCTTTGGT | 172        |          |           |
| Sbjct 1      | GTGAAGGATGAGTTACAGGGTGGGATGACGGACCGCTTCTGGGACCACTGGTATCTCTGGT | 60         |          |           |
| Query 173    | ATCTCCGCTTGCTTCGGCTTCTGGATCGAG                                | 202        |          |           |
| Sbjct 61     | ATCTCCGCTTGCTTCGGCTTCTGGATCGAG                                | 90         |          |           |

Figure S2. Sequence alignment of *mmKalnc2* and *hsKALNC2*. NCBI blast was used for the alignment, *mmKalnc2* was the subject and *hsKALNC2* was the query.
